# Supplementary material for: Multi-Epitope-Based Vaccine Candidate for Monkeypox: An In Silico Approach
Source: MDPI journal article supplement (doi:10.3390/vaccines10091564), 2022-09-19
Supplement: s1 [file s1]

## SUPPLEMENTARY TABLES

**Supplementary Table S1.** Physical and chemical characteristics of the targeted monkey pox sequence.

| Parameter                                                                                          | Value                                                                                                                 |
|----------------------------------------------------------------------------------------------------|-----------------------------------------------------------------------------------------------------------------------|
| Molecular weight                                                                                   | 35278.02                                                                                                              |
| Extinction coefficients Abs. 0.1% (=1 g/l) 1.595, assuming all pairs of Cys residues form cystines | 56270                                                                                                                 |
| Ext. coefficient Abs. 0.1% (=1 g/l) 1.595, assuming all Cys residues are reduced                   | 56270                                                                                                                 |
| Theoretical pI                                                                                     | 7.77                                                                                                                  |
| Total number of negatively charged residues (Asp + Glu)                                            | 31                                                                                                                    |
| Total number of positively charged residues (Arg + Lys)                                            | 32                                                                                                                    |
| Half-Life                                                                                          | 30 hours (mammalian reticulocytes, in vitro).<br>>20 hours (yeast, in vivo)<br>>10 hours (Escherichia coli, in vivo). |
| Instability index                                                                                  | 44.95                                                                                                                 |
| Grand average of hydropathicity (GRAVY)                                                            | -0.367                                                                                                                |
| Aliphatic index                                                                                    | 87.89                                                                                                                 |

**Supplementary Table S2:** Output of Predicted CTL epitopes as per NetCTL 1.2 server.

| Super-types | Epitopes   | Position | Prediction score | Allergenicity | Antigenicity score |
|-------------|------------|----------|------------------|---------------|--------------------|
| A1          | ITENYRNPY  | 215      | 3.09             | Non allergen  | 0.8011             |
|             | TTSPVRENY  | 242      | 2.71             | Non allergen  | 0.7917             |
|             | VSDHKNVYF  | 123      | 1.88             | Non allergen  | 1.0903             |
|             | GSNHLIDVY  | 77       | 1.86             | Allergen      | -0.0002            |
|             | QVSDHKNVY  | 122      | 1.53             | Allergen      | 0.2986             |
|             | PSTLDYFTY  | 161      | 1.5              | Non allergen  | 0.2981             |
|             | LNDDTQVYY  | 225      | 1.42             | Non allergen  | -0.126             |
|             | YVLSTIHIY  | 61       | 1.4              | Non allergen  | 0.5976             |
|             | MSAPFDSVF  | 146      | 1.33             | Non allergen  | -0.0184            |
|             | NLLPSTLDY  | 158      | 1.29             | Allergen      | 1.0771             |
|             | SADAAWIIF  | 177      | 1.19             | Non allergen  | 0.8244             |
|             | HSADAAWII  | 176      | 1.18             | Non allergen  | 0.8212             |
|             | KLNDDTQVY  | 224      | 1                | Allergen      | -0.3658            |
|             | RLKTLDIHY  | 20       | 0.92             | Non allergen  | 1.9035             |
|             | SAPFDSVFY  | 147      | 0.92             | Allergen      | 0.0542             |
|             | LSDLREACF  | 255      | 0.91             | Non allergen  | 1.7255             |
|             | LREACFSYY  | 258      | 0.83             | Non allergen  | 1.5067             |
|             | YSGEINLVH  | 87       | 0.82             | Allergen      | 0.8764             |
|             | ILFLMSQRY  | 290      | 0.79             | Non allergen  | 1.0469             |
|             | FILTAILFL  | 285      |                  |               |                    |
| A2          | STLDYFTYL  | 162      | 0.12             | Non allergen  | 0.1219             |
|             | ILTAILFLM  | 286      | 0.14             | Non allergen  | 0.1416             |
|             | KTFAIHAIIV | 274      | 1.03             | Non allergen  | 1.0273             |
|             | IIIAIFLQV  | 115      | 0.28             | Non allergen  | 0.2816             |
|             | YLDNLLPST  | 155      | 0.21             | Non allergen  | 0.2106             |
|             | FVFILTAIL  | 283      | 0.46             | Non allergen  | 0.4639             |
|             | FAIIAIVFV  | 276      | 1.34             | Non allergen  | 1.3444             |
|             | IIFPTPINI  | 183      | 0.52             | Allergen      | 0.5175             |
|             | NMSAPFDSV  | 145      | 0.24             | Allergen      | 0.2394             |
|             | GIHIAIFL   | 113      | 0.26             | Allergen      | 0.2618             |
|             | QLSPINIET  | 4        | 1.74             | Allergen      | 1.7364             |
|             | QLSKFRTL   | 195      | -0.88            | Non allergen  | -0.8785            |
|             | ILFLMSQRY  | 290      | 1.05             | Non allergen  | 1.0469             |
| A3          | KLNDDTQVY  | 224      | -0.37            | Non allergen  | -0.3658            |
|             | NIHSDQLSK  | 190      | -0.52            | Allergen      | -0.5227            |
|             | RLKTLDIHY  | 20       | 1.9              | Allergen      | 1.9035             |
|             | AILFLMSQR  | 289      | 1.06             | Non allergen  | 1.0611             |
|             | FLMSQRYSR  | 292      | 0.98             | Non allergen  | 0.9843             |
|             | KAISDTRLK  | 14       | 1                | Non allergen  | 1.0032             |
|             | NLLPSTLDY  | 158      | 1.08             | Allergen      | 1.0771             |
|             | MSQRYRSREK | 294      | 0.02             | Allergen      | 0.0244             |
|             | STIHIYWGK  | 64       | 1.26             | Non allergen  | 1.2641             |

|         |           |     |        |              |         |
|---------|-----------|-----|--------|--------------|---------|
|         | NLVHWNKKK | 92  | 1.23   | Non allergen | 1.232   |
|         | RTLLSSSNH | 200 | 0.01   | Allergen     | 0.0113  |
|         | EINLVHWNK | 90  | 1.37   | Non allergen | 1.3749  |
| A24     | VFILTAILF | 284 | 1.8027 | Non allergen | 0.3203  |
|         | EYVLSTIHI | 60  | 1.6367 | Non allergen | 0.74    |
|         | YFQKIVNQL | 130 | 1.4702 | Allergen     | -0.5633 |
|         | TFAlIAIVF | 275 | 1.4664 | Non allergen | 1.1105  |
|         | KYIEGNKTF | 268 | 1.386  | Allergen     | -0.5044 |
|         | AWIIFPTPI | 181 | 1.3567 | Allergen     | 0.1356  |
|         | YFTYLGTTI | 166 | 1.334  | Non allergen | 1.2121  |
|         | VFVFILTAI | 282 | 1.1803 | Non allergen | 0.2176  |
|         | KYSGEINLV | 86  | 1.1664 | Allergen     | 0.5484  |
|         | AlIAIVFVF | 277 | 1.0901 | Non allergen | 0.76    |
|         | YFMKWLSDL | 250 | 1.0015 | Non allergen | -0.835  |
|         | GFLPNEYVL | 55  | 0.8704 | Allergen     | 0.4979  |
|         | RSANMSAPF | 142 | 0.8239 | Non allergen | 0.9595  |
|         | APFDSVFYL | 148 | 1.0945 | Allergen     | 0.2814  |
| A26     | SPVRENYFM | 244 | 1.0464 | Non allergen | 0.7182  |
|         | LPNEYVLST | 57  | 0.7742 | Allergen     | 0.1009  |
| B7      | APFDSVFYL | 148 | 1.0945 | Allergen     | 0.2814  |
|         | SPVRENYFM | 244 | 1.0464 | Non allergen | 0.7182  |
|         | LPNEYVLST | 57  | 0.7742 |              |         |
|         | YFQKIVNQL | 130 | 1.3479 | Allergen     | -0.5633 |
| B8      | QLSKFRTLL | 195 | 1.1875 | Allergen     | -0.8785 |
|         | FVFILTAIL | 283 | 1.0192 | Non allergen | 0.4639  |
|         | WNKKKYSSY | 96  | 0.9608 | Non allergen | 0.7394  |
|         | IAIVFVFIL | 279 | 0.8848 | Non allergen | 0.9039  |
|         | YFMKWLSDL | 250 | 0.8357 | Non allergen | -0.835  |
|         | TGKLVRINF | 39  | 1.3479 | Non allergen | 1.0309  |
| B27     | VRINFKGGY | 43  | 1.4326 | Allergen     | 2.2055  |
|         | LREACFSYY | 258 | 0.9968 | Non allergen | 1.5067  |
|         | RSANMSAPF | 142 | 0.9404 | Non allergen | 0.9595  |
|         | IRAATTSPV | 238 | 0.8217 | Allergen     | 0.4958  |
| B3<br>9 | YKYSGEINL | 85  | 1.6933 | Allergen     | 0.4526  |
|         | KHDDGIII  | 109 | 1.5123 | Allergen     | 0.4287  |
|         | ENYRNPKYL | 217 | 1.3055 | Non allergen | 0.2126  |
|         | YFMKWLSDL | 250 | 1.238  | Non allergen | -0.835  |
|         | YFQKIVNQL | 130 | 1.2342 | Allergen     | -0.5633 |
|         | FVFILTAIL | 283 | 1.0181 | Allergen     | 0.4639  |
|         | NHEGKPHYI | 207 | 0.9476 | Allergen     | 0.645   |

|     |           |     |        |              |         |
|-----|-----------|-----|--------|--------------|---------|
| B44 | IAIVFVFIL | 279 | 0.7937 | Non allergen | 0.9039  |
|     | IHSDQLSKF | 191 | 0.7821 | Allergen     | -0.6628 |
|     | RNEYFMKWL | 247 | 1.7064 | Non allergen | 0.1141  |
| B58 | MSAPFDSVF | 146 | 1.9014 | Non allergen | -0.0184 |
|     | RSANMSAPF | 142 | 1.7392 | Non allergen | 0.959   |
|     | VLSTIHIYW | 62  | 1.7351 | Non allergen | 1.2426  |
|     | TTSPVRENY | 242 | 1.4866 | Non allergen | 0.7917  |
|     | IAIVFVFIL | 279 | 1.447  | Non allergen | 0.9039  |
|     | AIIAIVFVF | 277 | 1.1929 | Non allergen | 0.76    |
|     | SADAAWIIF | 177 | 1.027  | Non allergen | 0.8244  |
|     | HSADAAWII | 176 | 0.9919 | Non allergen | 0.8212  |
|     | VSDHKNVYF | 123 | 0.8657 | Non allergen | 1.0903  |
|     | GSNHLIDVY | 77  | 0.8267 | Non allergen | -0.0002 |
|     | KLNDDTQVY | 224 | 0.7861 | Non allergen | -0.3658 |
|     | INHSADAAW | 174 | 0.7821 | Allergen     | 0.7485  |
| B62 | KLNDDTQVY | 224 | 1.438  | Non allergen | -0.3658 |
|     | YVLSTIHIY | 61  | 1.3805 | Non allergen | 0.5976  |
|     | RSANMSAPF | 142 | 1.3512 | Non allergen | 0.9595  |
|     | MSAPFDSVF | 146 | 1.34   | Non allergen | -0.0184 |
|     | RLKTLDIHY | 20  | 1.3211 | Non allergen | 1.9035  |
|     | ILFLMSQRY | 290 | 1.3062 | Allergen     | 1.0469  |
|     | QVSDHKNVY | 122 | 1.2635 | Non allergen | 0.2986  |
|     | AIIAIVFVF | 277 | 1.2462 | Non allergen | 0.76    |
|     | WNKKKYSSY | 96  | 1.1426 | Non allergen | 0.7394  |
|     | ITENYRNPY | 215 | 1.1355 | Non allergen | 0.8011  |
|     | DLREACFSY | 257 | 1.0703 | Allergen     | 2.22258 |
|     | NLLPSTLDY | 158 | 1.0664 | Allergen     | 1.077   |
|     | GSNHLIDVY | 77  | 1.0186 | Allergen     | -0.0002 |
|     | KYIEGNKTF | 268 | 0.9892 | Allergen     | -0.5044 |
|     | LVHWNKKKY | 93  | 0.9244 | Non allergen | 1.041   |
|     | VFILTAILF | 284 | 0.8808 | Allergen     | 0.3203  |
|     | SNHEGKPHY | 206 | 0.8546 | Non allergen | 0.717   |
|     | FVFILTAIL | 283 | 0.846  | Non allergen | 0.4639  |
|     | TTSPVRENY | 242 | 0.8293 | Non allergen | 0.7917  |
|     | TFAIIAIVF | 275 | 0.8047 | Allergen     | 1.1105  |

**Supplementary Table S3.** A cytotoxic T-lymphocyte epitope that has been chosen. The table's epitopes are non-toxic, non-allergic, and completely conserved across the target protein sequence (as predicted using the IDEB conservancy tool). Epitopes with IC50 values under 250 were thought to bind appropriately with the corresponding human leukocyte antigen (HLA) alleles. The antigenicity of the epitopes was predicted using the VaxiJen v2.0 server at 0.4 thresholds.

| Epitopes  | Position | HLA class 1 super types<br>(Combined score) | MHC Class 1 alleles | IC50   | Antigenicity |
|-----------|----------|---------------------------------------------|---------------------|--------|--------------|
| VSDHKNVYF | 123      | A1(1.8)                                     | HLA-C*05:01         | 3.4    | 1.09         |
| VSDHKNVYF | 123      |                                             | HLA-C*01:01         | 242    | 1.09         |
| VSDHKNVYF | 123      |                                             | HLA-C*07:01         | 139    | 1.09         |
| VSDHKNVYF | 123      |                                             | HLA-C*12:03         | 23.50  | 1.09         |
| VSDHKNVYF | 123      |                                             | HLA-C*01:01         | 242    | 1.09         |
| RLKTLDIHY | 20       | A1(0.92)                                    | HLA-B*12:03         | 8.7    | 0.92         |
| RLKTLDIHY | 20       |                                             | HLA-B*15:01         | 82.98  | 0.92         |
| RLKTLDIHY | 20       |                                             | HLA-B*30:02         | 288.7  | 0.92         |
| RLKTLDIHY | 20       |                                             | HLA-B*14:02         | 301.03 | 0.92         |
| RLKTLDIHY | 20       |                                             | HLA-B*15:01         | 82.98  | 0.92         |
| LSDLREACF | 255      | A1(0.90)                                    | HLA-C*05:01         | 1.255  | 1.25         |
| LSDLREACF | 255      |                                             | HLA-C*12:03         | 17.50  | 1.25         |
| LSDLREACF | 255      |                                             | HLA-C*14:02         | 284.85 | 1.25         |
| LSDLREACF | 255      |                                             | HLA-C*08:02         | 421.85 | 1.25         |
| LSDLREACF | 255      |                                             | HLA-B*15:02         | 345.32 | 1.25         |
| LREACFSYY | 258      | A1(0.80)                                    | HLA-C*12:03         | 258    | 1.50         |
| LREACFSYY | 258      |                                             | HLA-C*14:02         | 258    | 1.50         |
| LREACFSYY | 258      |                                             | HLA-C*07:01         | 258    | 1.50         |
| LREACFSYY | 258      |                                             | HLA-C*06:02         | 258    | 1.50         |
| LREACFSYY | 258      |                                             | HLA-C*07:02         | 258    | 1.50         |
| ILFLMSQRY | 290      | A1(0.70)                                    | HLA-C*12:03         | 20.19  | 1.04         |
| ILFLMSQRY | 290      |                                             | HLA-A*29:02         | 54.92  | 1.04         |
| ILFLMSQRY | 290      |                                             | HLA-B*15:01         | 92.46  | 1.04         |
| ILFLMSQRY | 290      |                                             | HLA-C*14:02         | 132.92 | 1.04         |
| ILFLMSQRY | 290      |                                             | HLA-B*15:02         | 197.34 | 1.04         |
| KTFaIIAIV | 274      | A2(0.70)                                    | HLA-C*12:03         | 9.5    | 1.19         |
| KTFaIIAIV | 274      |                                             | HLA-A*02:06         | 45.03  | 1.19         |
| KTFaIIAIV | 274      |                                             | HLA-C*30:01         | 56.23  | 1.19         |
| KTFaIIAIV | 274      |                                             | HLA-C*02:01         | 103.06 | 1.19         |
| KTFaIIAIV | 274      |                                             | HLA-C*14:02         | 136.02 | 1.19         |
| FAIIAIVFV | 276      | A2(0.35)                                    | HLA-C*12:03         | 6.8    | 1.34         |
| FAIIAIVFV | 276      |                                             | HLA-C*02:06         | 9.17   | 1.34         |
| FAIIAIVFV | 276      |                                             | HLA-C*03:03         | 18.13  | 1.34         |
| FAIIAIVFV | 276      |                                             | HLA-C*02:01         | 59.44  | 1.34         |
| FAIIAIVFV | 276      |                                             | HLA-C*15:02         | 190.29 | 1.34         |
| ILFLMSQRY | 290      | A3(1.2)                                     | HLA-A*12:03         | 20.19  | 1.04         |
| ILFLMSQRY | 290      |                                             | HLA-A*29:02         | 54.92  | 1.04         |
| ILFLMSQRY | 290      |                                             | HLA-B*15:01         | 92.46  | 1.04         |
| ILFLMSQRY | 290      |                                             | HLA-C*14:02         | 132.92 | 1.04         |
| ILFLMSQRY | 290      |                                             | HLA-B*15:02         | 197.34 | 1.04         |

|           |     |           |             |        |       |
|-----------|-----|-----------|-------------|--------|-------|
| KAISDTRLK | 14  | A3(1.05)  | HLA-C*12:03 | 15.71  | 1.003 |
| KAISDTRLK | 14  |           | HLA-A*03:03 | 38.51  | 1.003 |
| KAISDTRLK | 14  |           | HLA-A*30:01 | 73.95  | 1.003 |
| KAISDTRLK | 14  |           | HLA-A*11:01 | 138.13 | 1.003 |
| KAISDTRLK | 14  |           | HLA-A*15:02 | 349.47 | 1.003 |
| STIHIYWGK | 64  | A3(0.9)   | HLA-A*68:01 | 13.41  | 1.26  |
| STIHIYWGK | 64  |           | HLA-A*11:01 | 13.94  | 1.26  |
| STIHIYWGK | 64  |           | HLA-A*12:03 | 33.51  | 1.26  |
| STIHIYWGK | 64  |           | HLA-A*03:03 | 66.16  | 1.26  |
| STIHIYWGK | 64  |           | HLA-A*30:01 | 125.88 | 1.26  |
| NLVHWNKKK | 92  | A3(0.91)  | HLA-C*12:03 | 41.32  | 1.23  |
| NLVHWNKKK | 92  |           | HLA-C*14:02 | 90.28  | 1.23  |
| NLVHWNKKK | 92  |           | HLA-C*03:03 | 106.07 | 1.23  |
| NLVHWNKKK | 92  |           | HLA-C*14:02 | 90.28  | 1.23  |
| NLVHWNKKK | 92  |           | HLA-C*03:03 | 106.07 | 1.23  |
| EINLVHWNK | 90  | A3(0.77)  | HLA-C*12:03 | 34.69  | 1.3   |
| EINLVHWNK | 90  |           | HLA-A*68:01 | 42.21  | 1.3   |
| EINLVHWNK | 90  |           | HLA-A*05:01 | 51.72  | 1.3   |
| EINLVHWNK | 90  |           | HLA-A*15:02 | 151.50 | 1.3   |
| EINLVHWNK | 90  |           | HLA-A*11:01 | 232.97 | 1.3   |
| YFTYLGTTI | 166 | A3(0.15)  | HLA-C*03:03 | 13.32  | 1.2   |
| YFTYLGTTI | 166 |           | HLA-C*14:02 | 32.85  | 1.2   |
| YFTYLGTTI | 166 |           | HLA-C*12:03 | 54.22  | 1.2   |
| YFTYLGTTI | 166 |           | HLA-B*15:02 | 210.97 | 1.2   |
| YFTYLGTTI | 166 |           | HLA-C*08:02 | 259.53 | 1.2   |
| SPVRENYFM | 244 | A26(1.09) | HLA-C*03:03 | 26.27  | 0.71  |
| SPVRENYFM | 244 |           | HLA-C*12:03 | 33.51  | 0.71  |
| SPVRENYFM | 244 |           | HLA-B*35:01 | 90.69  | 0.71  |
| SPVRENYFM | 244 |           | HLA-B*15:02 | 329.79 | 0.71  |
| SPVRENYFM | 244 |           | HLA-B*07:02 | 522.26 | 0.71  |
| WNKKKYSSY | 96  | B8(0.9)   | HLA-C*12:03 | 4.67   | 0.73  |
| WNKKKYSSY | 96  |           | HLA-C*03:03 | 68.64  | 0.73  |
| WNKKKYSSY | 96  |           | HLA-B*08:01 | 173    | 0.73  |
| WNKKKYSSY | 96  |           | HLA-C*14:02 | 255.63 | 0.73  |
| WNKKKYSSY | 96  |           | HLA-B*08:01 | 173    | 0.73  |
| IAIVFVFIL | 279 | B8(0.88)  | HLA-C*03:03 | 10.92  | 0.90  |
| IAIVFVFIL | 279 |           | HLA-C*12:03 | 24.72  | 0.90  |
| IAIVFVFIL | 279 |           | HLA-B*15:02 | 130.08 | 0.90  |
| IAIVFVFIL | 279 |           | HLA-B*58:01 | 165.31 | 0.90  |
| IAIVFVFIL | 279 |           | HLA-A*02:01 | 352.46 | 0.90  |
| VLSTIHIYW | 62  | B58(1.7)  | HLA-C*03:03 | 33.69  | 1.2   |
| VLSTIHIYW | 62  |           | HLA-C*12:03 | 48.32  | 1.2   |
| VLSTIHIYW | 62  |           | HLA-C*14:02 | 62.60  | 1.2   |
| VLSTIHIYW | 62  |           | HLA-B*58:01 | 127.43 | 1.2   |
| VLSTIHIYW | 62  |           | HLA-C*05:01 | 200.29 | 1.2   |
| TTSPVRENY | 242 | B58(1.4)  | HLA-C*12:03 | 29.45  | 0.79  |
| TTSPVRENY | 242 |           | HLA-C*03:03 | 41.26  | 0.79  |
| TTSPVRENY | 242 |           | HLA-A*68:01 | 177.21 | 0.79  |
| TTSPVRENY | 242 |           | HLA-A*29:02 | 178.55 | 0.79  |

|           |     |           |             |        |       |
|-----------|-----|-----------|-------------|--------|-------|
| TTSPVRENY | 242 | B58(1.4)  | HLA-C*14:02 | 205.40 | 0.79  |
| IAIVFVFIL | 279 |           | HLA-C*03:03 | 10.92  | 0.90  |
| IAIVFVFIL | 279 |           | HLA-C*12:03 | 24.72  | 0.90  |
| IAIVFVFIL | 279 |           | HLA-B*15:02 | 130.08 | 0.90  |
| IAIVFVFIL | 279 |           | HLA-B*58:01 | 165.31 | 0.90  |
| IAIVFVFIL | 279 |           | HLA-A*02:01 | 352.46 | 0.90  |
| VSDHKNVYF | 123 | B58(0.86) | HLA-C*05:01 | 3.43   | 1.09  |
| VSDHKNVYF | 123 |           | HLA-C*12:03 | 23.50  | 1.09  |
| VSDHKNVYF | 123 |           | HLA-C*07:01 | 139.04 | 1.09  |
| VSDHKNVYF | 123 |           | HLA-A*01:01 | 242.40 | 1.09  |
| VSDHKNVYF | 123 |           | HLA-C*14:02 | 286.82 | 1.09  |
| RLKTLDIHY | 20  | B62(1.3)  | HLA-B*12:03 | 8.75   | 1.90  |
| RLKTLDIHY | 20  |           | HLA-B*15:01 | 82.98  | 1.90  |
| RLKTLDIHY | 20  |           | HLA-B*30:02 | 288.70 | 1.90  |
| RLKTLDIHY | 20  |           | HLA-B*14:02 | 301.03 | 1.90  |
| RLKTLDIHY | 20  |           | HLA-B*15:02 | 335.91 | 1.90  |
| LVHWNKKKY | 93  | B62(0.92) | HLA-C*12:03 | 39.01  | 1.041 |
| LVHWNKKKY | 93  |           | HLA-C*14:02 | 84.84  | 1.041 |
| LVHWNKKKY | 93  |           | HLA-C*03:03 | 126.36 | 1.041 |
| LVHWNKKKY | 93  |           | HLA-C*29:02 | 331.71 | 1.041 |
| LVHWNKKKY | 93  |           | HLA-C*15:02 | 410.42 | 1.041 |

Note- All epitope was predicted as non-toxin

**Supplementary Table S4.** Details on a specific helper T-lymphocyte epitope used in the vaccine's development. The epitopes are categorized as strong and weak binders with respective HLA\_DRB1 alleles based on the binding score of less than 2% and 10%, respectively.

| Epitopes (position )     | MHC class 11 alleles | Binding score (%) | Remarks       | Antigenicity |
|--------------------------|----------------------|-------------------|---------------|--------------|
| TLDYFTYLGTTINHS<br>(4)   | DRB1*01:01           | 1.7               | Strong binder | 0.7133       |
|                          | DRB1*04:01           | 0.6               | Strong binder |              |
|                          | DRB1*07:01           | 5.0               | Weak binder   |              |
| LDYFTYLGTTINHS (164)     | DRB1*01:01           | 1.0               | Strong binder | 0.6153       |
|                          | DRB1*04:01           | 0.25              | Strong binder |              |
|                          | DRB1*07:01           | 4                 | Weak binder   |              |
|                          | DRB1*08:01           | 6.5               | Weak binder   |              |
|                          | DRB1*11:01           | 9.5               | Weak binder   |              |
| DYFTYLGTTINHSAD<br>(165) | DRB1*01:01           | 1.6               | Strong binder | 0.60         |
|                          | DRB1*04:01           | 0.4               | Strong binder |              |
|                          | DRB1*07:01           | 5.5               | Weak binder   |              |
|                          | DRB1*08:01           | 9                 | Weak binder   |              |
|                          | DRB1*01:01           | 1.7               | Strong binder |              |
|                          | DRB1*04:01           | 0.4               | Strong binder |              |

|                       |            |     |             |       |
|-----------------------|------------|-----|-------------|-------|
| YFTYLGTTINHSADA (166) | DRB1*07:01 | 0.4 | Weak binder | 0.822 |
|                       | DRB1*08:01 | 8   | Weak binder |       |

**Supplementary Table S5.** Selected interferon-gamma epitopes included in the vaccine constructs. The epitope was predicted by using the IFN-epitope server.

| Epitopes Sequence | Result   | Score | Antigenicity |
|-------------------|----------|-------|--------------|
| KKHDDGIIIIAIFLQ   | Positive | 0.240 | 0.50         |
| GIIIAIFLQVSDHK    | Positive | 0.513 | 0.487        |
| IIIIAIFLQVSDHKN   | Positive | 0.295 | 0.54         |
| LDSIRSANMSAPFDS   | Positive | 0.04  | 0.50         |



Supplementary Figure S1. SOPMA result.

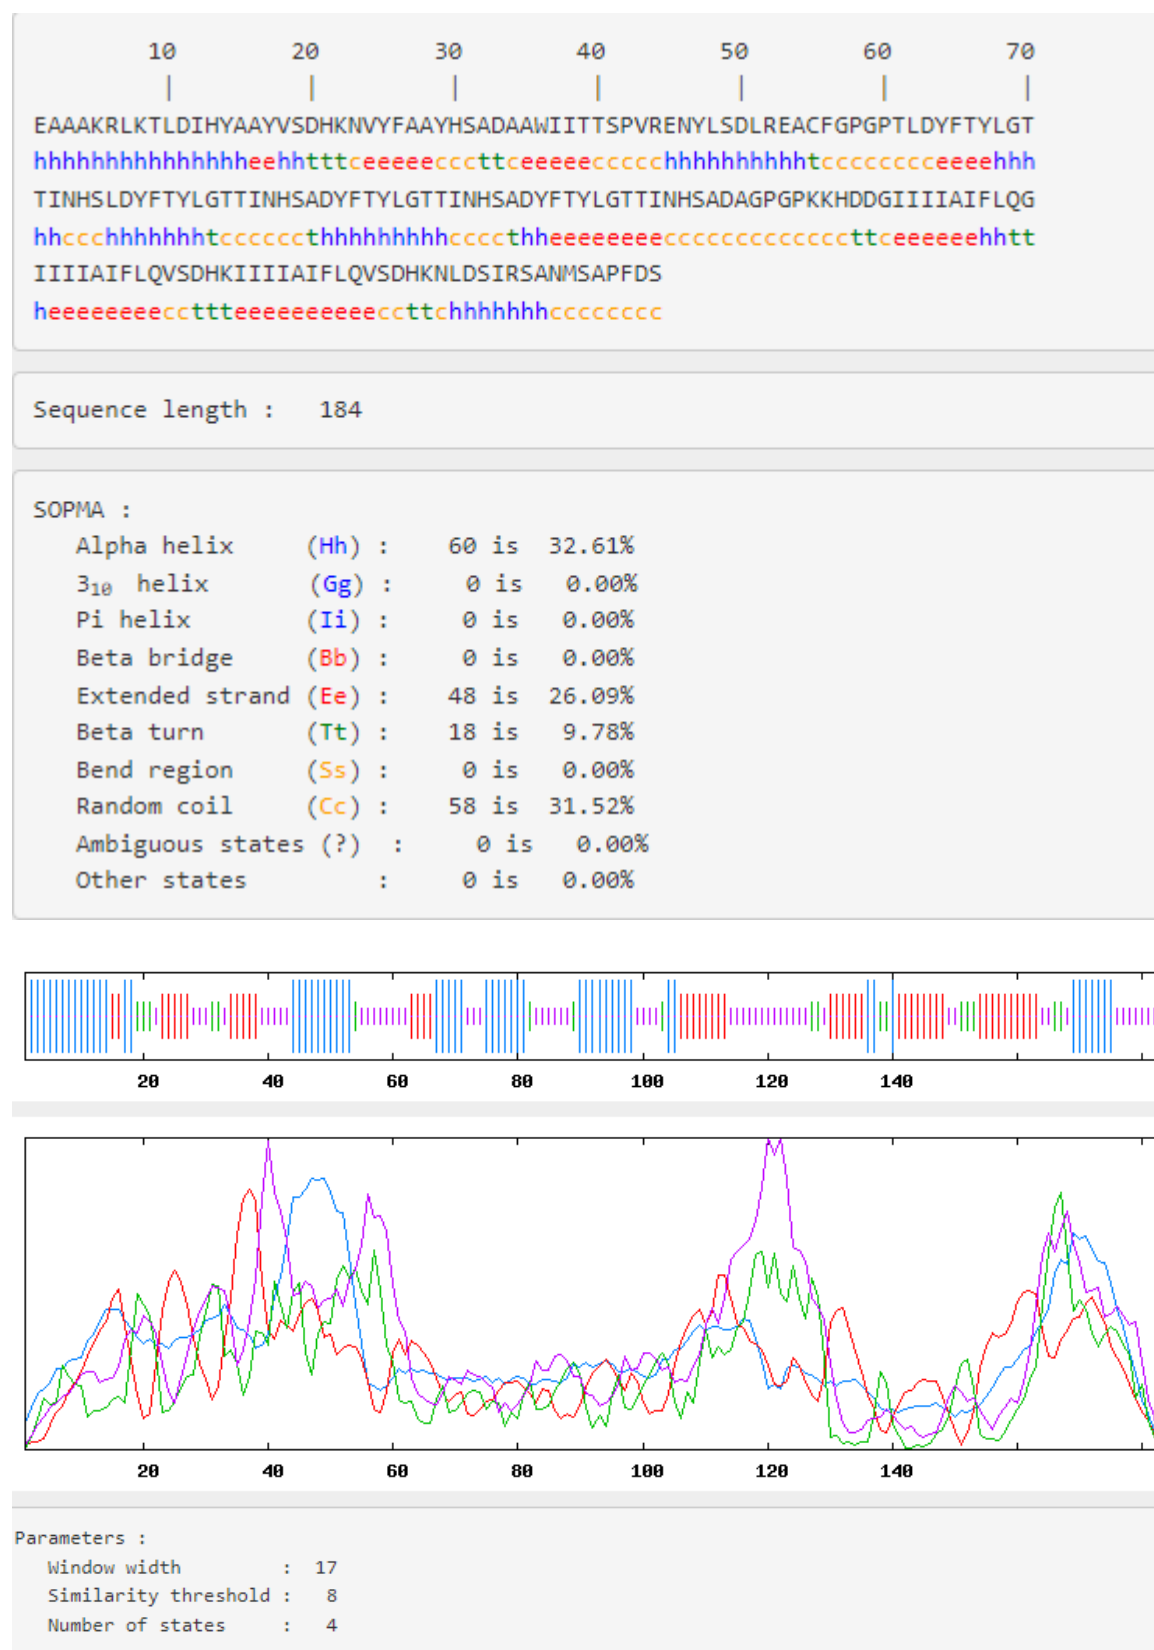

**Supplementary Figure S2. Model 1.**

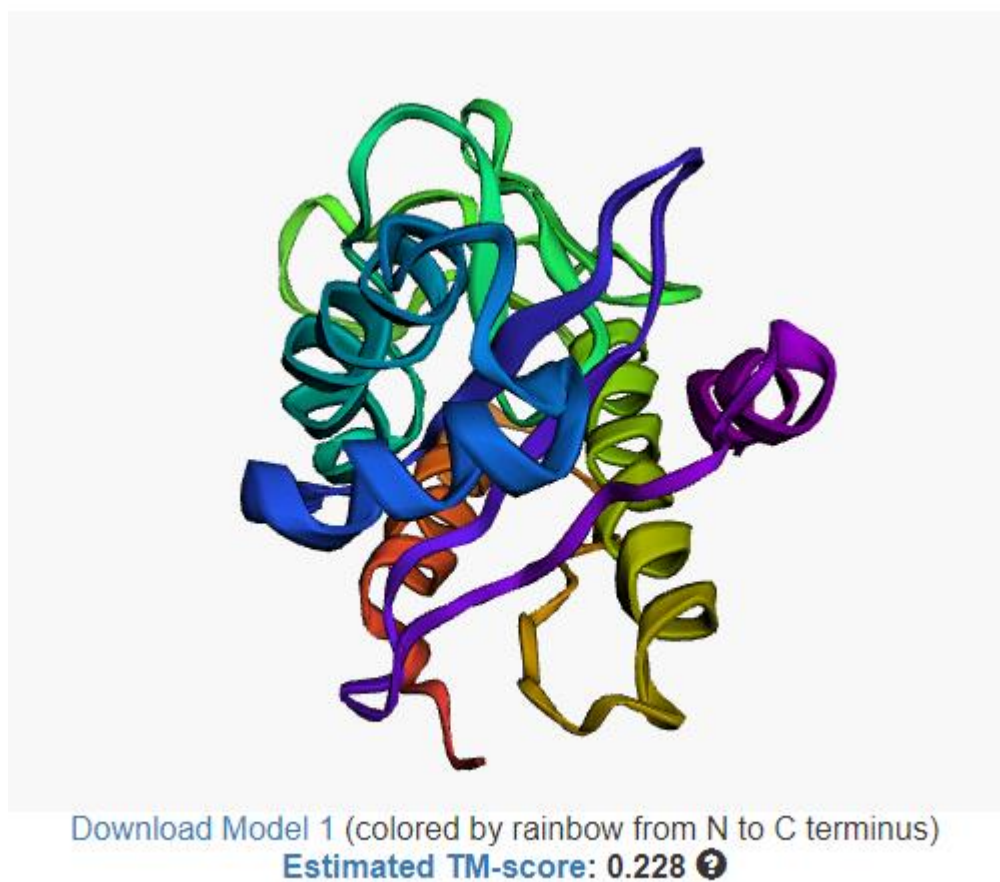

**Supplementary Table S6:** Refined the best vaccine structuresby using Galaxy refine web server.

| Model   | GDT-HA | RMSD  | MolProbity | Clash score | Poor rotamers | Rama favored |
|---------|--------|-------|------------|-------------|---------------|--------------|
| Initial | 1.0000 | 0.000 | 1.974      | 8.9         | 1.2           | 93.2         |
| MODEL 1 | 0.9688 | 0.358 | 2.19       | 11.8        | 0.0           | 87.4         |
| MODEL 2 | 0.9688 | 0.350 | 2.23       | 12.8        | 0.6           | 87.4         |
| MODEL 3 | 0.949  | 0.407 | 2.31       | 15.3        | 0.0           | 86.8         |
| MODEL 4 | 0.9701 | 0.356 | 2.24       | 13.2        | 0.0           | 87.4         |
| MODEL 5 | 0.968  | 0.350 | 2.30       | 15.3        | 0.6           | 87.4         |

**Supplementary Table S7:** Ramachandran plot statistics of the vaccine structure.

**Plot statistics**

|                                                                                  |         |        |
|----------------------------------------------------------------------------------|---------|--------|
| Residues in most favoured regions [A, B, L]                                      | 134     | 80.7%  |
| Residues in additional allowed regions [a,b,l,p]                                 | 2112.7% |        |
| Residues in generously allowed regions [ $\sim$ a, $\sim$ b, $\sim$ l, $\sim$ p] | 5       | 3.0%   |
| Residues in disallowed regions                                                   | 6       | 3.6%   |
|                                                                                  | ----    | -----  |
| Number of non-glycine and non-proline residues                                   | 166     | 100.0% |
| Number of end-residues (excl. Gly and Pro)                                       | 2       |        |
| Number of glycine residues (shown as triangles)                                  | 10      |        |
| Number of proline residues                                                       | 6       |        |
|                                                                                  | ----    |        |
| Total number of residues                                                         | 184     |        |

Based on an analysis of 118 structures of resolution of at least 2.0 Angstroms and R-factor no greater than 20%, a good quality model would be expected to have over 90% in the most favoured regions.

**Supplementary Figure S3:** The ERRAT plot of the finalized multi-epitopic vaccine structure.

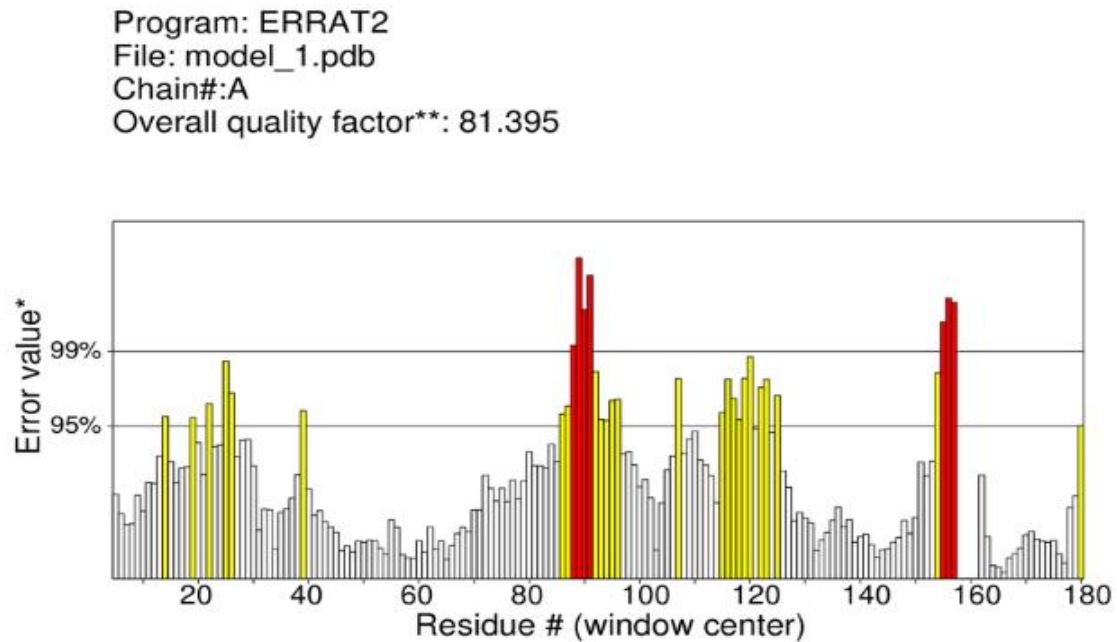

\*On the error axis, two lines are drawn to indicate the confidence with which it is possible to reject regions that exceed that error value.

\*\*Expressed as the percentage of the protein for which the calculated error value falls below the 95% rejection limit. Good high resolution structures generally produce values around 95% or higher. For lower resolutions (2.5 to 3Å) the average overall quality factor is around 91%.

**Supplementary Figure S4:** Allergenicity assessment of the final multi-epitope vaccine. The vaccine was found to be non-allergen by (A) AllerTOP v2.0 and (B) Allergen FP v1.0 sever.

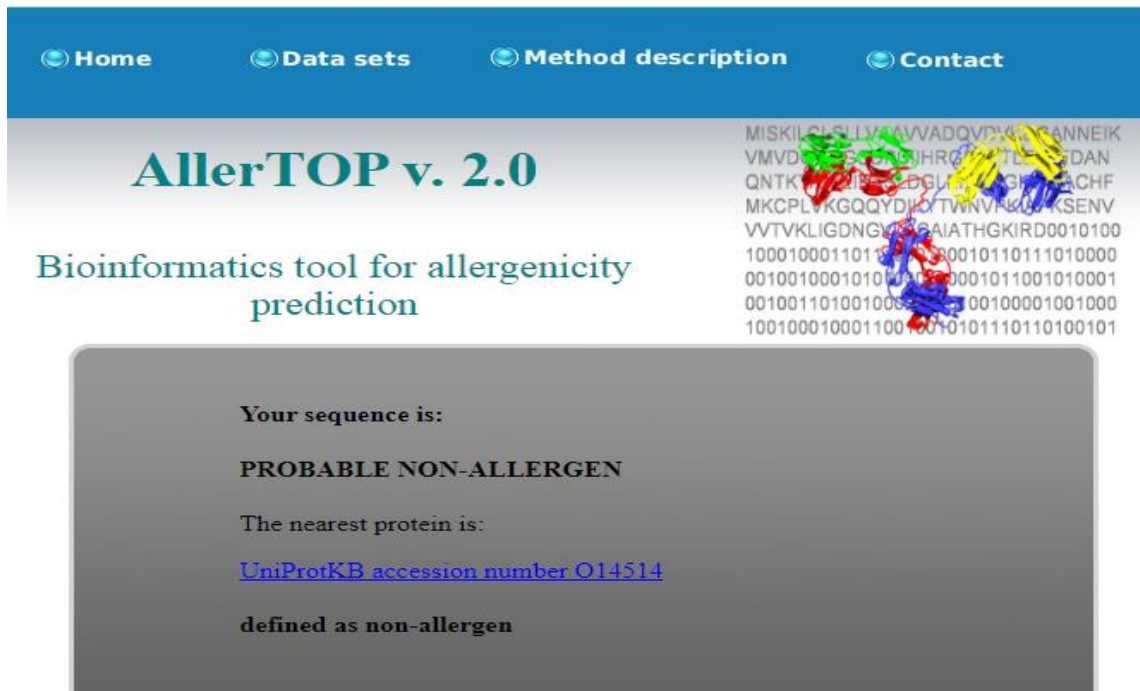

Home Data sets Method description Contact

## AllerTOP v. 2.0

Bioinformatics tool for allergenicity prediction

MISKILCLSLVAVVADQVDVACANNEIK  
VMVDLSEGLHRCPTLEEDAN  
QNTKQINLEDGLTNGHACHF  
MKCPLVKGQYDIDVTWNVKQKSENV  
VTVKLIGDNGVSGAIATHGKIRD0010100  
100010001101100001011011010000  
0010010001010100001011001010001  
00100110100100000000100001001000  
1001000100011000010101110110100101

**Your sequence is:**

**PROBABLE NON-ALLERGEN**

The nearest protein is:

[UniProtKB accession number O14514](#)

**defined as non-allergen**

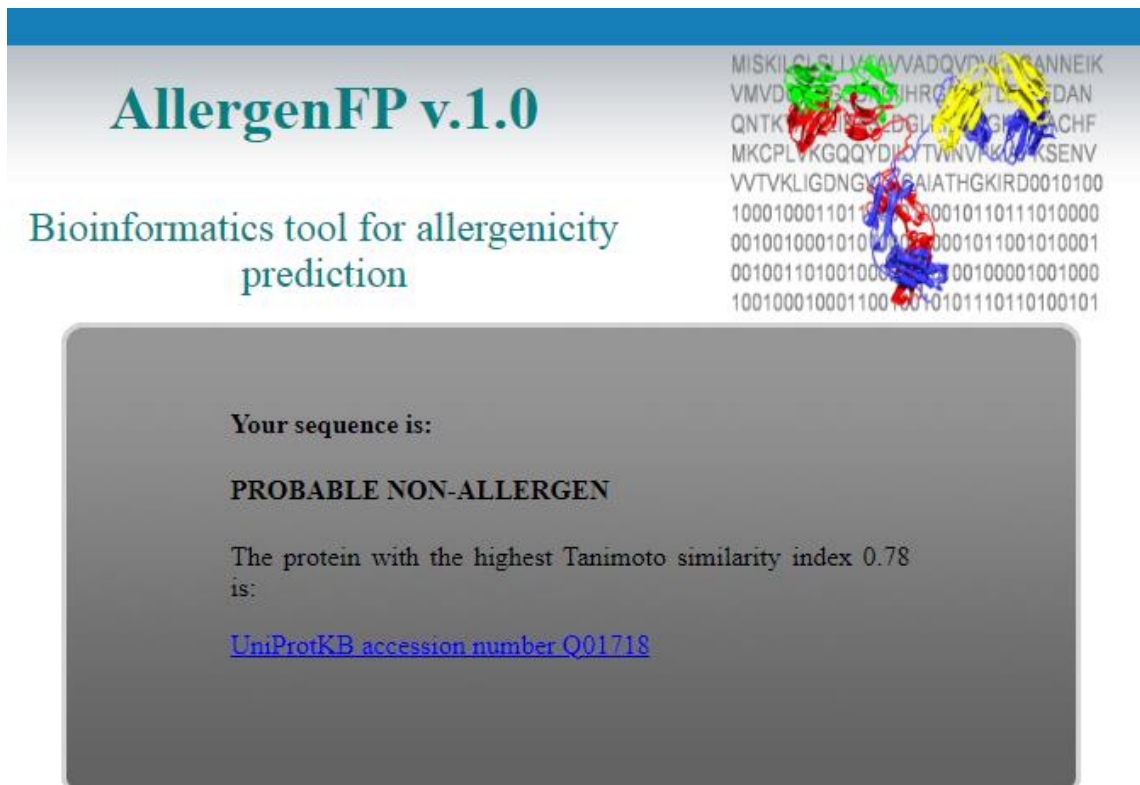

## AllergenFP v.1.0

Bioinformatics tool for allergenicity prediction

MISKILCLSLVAVVADQVDVACANNEIK  
VMVDLSEGLHRCPTLEEDAN  
QNTKQINLEDGLTNGHACHF  
MKCPLVKGQYDIDVTWNVKQKSENV  
VTVKLIGDNGVSGAIATHGKIRD0010100  
100010001101100001011011010000  
0010010001010100001011001010001  
00100110100100000000100001001000  
1001000100011000010101110110100101

**Your sequence is:**

**PROBABLE NON-ALLERGEN**

The protein with the highest Tanimoto similarity index 0.78 is:

[UniProtKB accession number Q01718](#)

**Supplementary Table S8.** Physico-chemical properties of the final multi-epitope vaccine construct.

**Number of amino acids:** 184

**Molecular weight:** 20430.02

**Theoretical pI:** 5.71

**Amino acid composition:**

|         |    |       |
|---------|----|-------|
| Ala (A) | 20 | 10.9% |
| Arg (R) | 4  | 2.2%  |
| Asn (N) | 8  | 4.3%  |
| Asp (D) | 15 | 8.2%  |
| Cys (C) | 1  | 0.5%  |
| Gln (Q) | 3  | 1.6%  |
| Glu (E) | 3  | 1.6%  |
| Gly (G) | 10 | 5.4%  |
| His (H) | 10 | 5.4%  |
| Ile (I) | 23 | 12.5% |
| Leu (L) | 14 | 7.6%  |
| Lys (K) | 7  | 3.8%  |
| Met (M) | 1  | 0.5%  |
| Phe (F) | 10 | 5.4%  |
| Pro (P) | 6  | 3.3%  |
| Ser (S) | 14 | 7.6%  |
| Thr (T) | 16 | 8.7%  |
| Trp (W) | 1  | 0.5%  |
| Tyr (Y) | 13 | 7.1%  |
| Val (V) | 5  | 2.7%  |
| Pyl (O) | 0  | 0.0%  |
| Sec (U) | 0  | 0.0%  |

(B) 0 0.0%

(Z) 0 0.0%

(X) 0 0.0%

**Total number of negatively charged residues (Asp + Glu):** 18

**Total number of positively charged residues (Arg + Lys):** 11

**Atomic composition:**

|          |   |      |
|----------|---|------|
| Carbon   | C | 937  |
| Hydrogen | H | 1409 |
| Nitrogen | N | 235  |
| Oxygen   | O | 275  |
| Sulfur   | S | 2    |

**Formula:** C<sub>937</sub>H<sub>1409</sub>N<sub>235</sub>O<sub>275</sub>S<sub>2</sub>

**Total number of atoms:** 2858

#### **Extinction coefficients:**

Extinction coefficients are in units of M<sup>-1</sup> cm<sup>-1</sup>, at 280 nm measured in water.

Ext. coefficient 24870

Abs 0.1% (=1 g/l) 1.217, assuming all pairs of Cys residues form cystines

Ext. coefficient 24870

Abs 0.1% (=1 g/l) 1.217, assuming all Cys residues are reduced

#### **Estimated half-life:**

The N-terminal of the sequence considered is E (Glu).

The estimated half-life is: 1 hours (mammalian reticulocytes, in vitro).

30 min (yeast, in vivo).

>10 hours (Escherichia coli, in vivo).

#### **Instability index:**

The instability index (II) is computed to be 35.65

This classifies the protein as stable.

**Aliphatic index:** 97.17

**Grand average of hydropathicity (GRAVY):** 0.073

**Supplementary Figure S5:** Signal peptide prediction in the vaccine constructs.

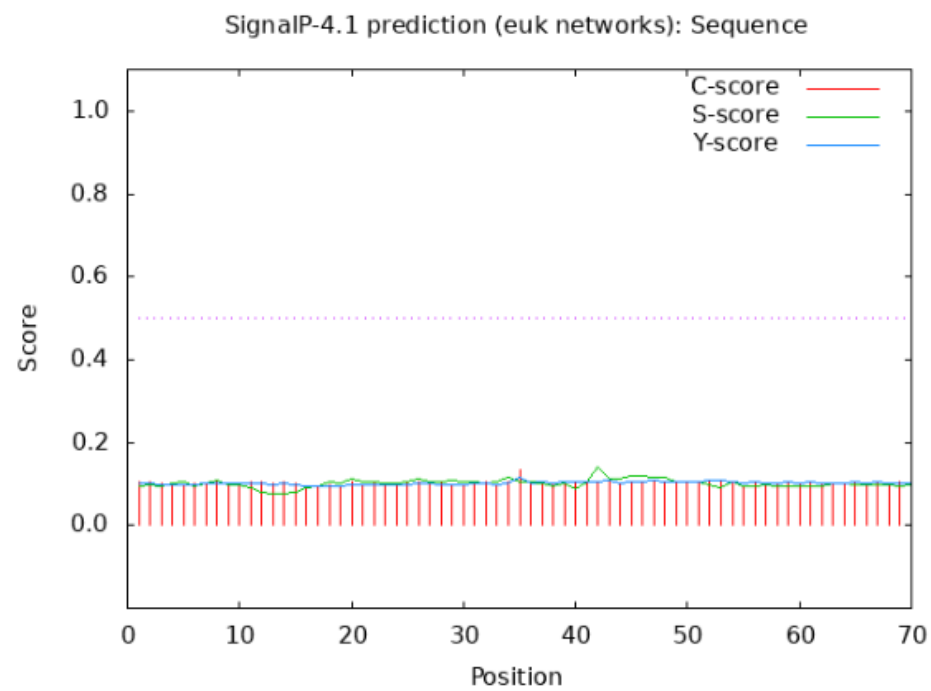

```
# Measure Position Value Cutoff signal peptide?
max. C 35 0.135
max. Y 35 0.117
max. S 42 0.142
mean S 1-34 0.100
D 1-34 0.108 0.450 NO
Name=Sequence SP='NO' D=0.108 D-cutoff=0.450 Networks=SignalP-noTM
```



**Supplementary Table S9: The Linear B-cell epitopes are described in the developed vaccine.**

| No | Start | End | Peptide                   | No of residue | Score |
|----|-------|-----|---------------------------|---------------|-------|
| 1  | 179   | 184 | SAPFDS                    | 6             | 0.72  |
| 2  | 8     | 14  | KTLDIHY                   | 7             | 0.699 |
| 3  | 110   | 133 | LGTTINHSADAGPGPKKHDDGIII  | 2             | 0.674 |
| 4  | 43    | 67  | VRENYLSDLREACFGPGPTLDYFTY | 25            | 0.66  |
| 5  | 151   | 157 | SDHKIII                   | 7             | 0.652 |
| 6  | 102   | 107 | HSADYF                    | 6             | 0.633 |
| 7  | 19    | 23  | SDHKN                     | 5             | 0.63  |
| 8  | 160   | 172 | IFLQVSDHKNLDS             | 13            | 0.613 |
| 9  | 29    | 35  | YHSADAA                   | 7             | 0.599 |
| 10 | 88    | 92  | HSADY                     | 5             | 0.533 |

**Supplementary Table S10:** The developed vaccine had 102 residues that the Ellipro server indicated would fall under the category of discontinuous B-cell epitopes.

| No | Residues                                                                                                                                                                                                                                                                                                                                                                                                                                                                                                                                     | No of residue | Score |
|----|----------------------------------------------------------------------------------------------------------------------------------------------------------------------------------------------------------------------------------------------------------------------------------------------------------------------------------------------------------------------------------------------------------------------------------------------------------------------------------------------------------------------------------------------|---------------|-------|
| 1  | A:T9, A:L10, A:D11, A:I12, A:H13, A:Y14, A:V18, A:Y29, A:H30, A:S31, A:A32, A:D33, A:A34, A:A35, A:W36, A:V43, A:E45, A:N46, A:Y47, A:S49, A:D50, A:R52, A:E53, A:A54, A:F56, A:G57, A:P58, A:G59, A:P60, A:T61, A:L62, A:D63, A:Y64, A:F65, A:T66                                                                                                                                                                                                                                                                                           | 35            | 0.665 |
| 2  | A:S19, A:D20, A:H21, A:K22, A:N23, A:H88, A:S89, A:A90, A:D91, A:Y92, A:N101, A:H102, A:S103, A:A104, A:D105, A:Y106, A:T108, A:L110, A:G111, A:T112, A:T113, A:I114, A:N115, A:H116, A:S117, A:A118, A:D119, A:A120, A:G121, A:P122, A:G123, A:P124, A:K125, A:K126, A:H127, A:D128, A:D129, A:G130, A:I131, A:I133, A:F147, A:L148, A:S151, A:D152, A:H153, A:K154, A:I155, A:I156, A:I157, A:I158, A:Q163, A:V164, A:S165, A:D166, A:H167, A:K168, A:N169, A:D171, A:S172, A:S175, A:A176, A:S179, A:A180, A:P181, A:F182, A:D183, A:S184 | 67            | 0.659 |

**Supplementary Table S11:** Refinement of the best-docked complexes (TLR4-vaccine, TLR 2-Vaccine) on FireDock.

| Rank | Solution Number | Global Energy | Attractive VdW | Repulsive VdW | ACE   | HB    |
|------|-----------------|---------------|----------------|---------------|-------|-------|
| 1    | 10              | -21.16        | -42.23         | 38.54         | 9.29  | -6.82 |
| 2    | 7               | -12.11        | -30.60         | 25.48         | 7.16  | -1.40 |
| 3    | 1               | 3.67          | -0.78          | 0.02          | 0.41  | 0.00  |
| 4    | 4               | 11.05         | -7.50          | 1.30          | 3.78  | 0.00  |
| 5    | 3               | 29.61         | -36.49         | 21.50         | 10.85 | -2.81 |
| 6    | 2               | 140.05        | -59.29         | 260.30        | 11.15 | -7.26 |
| 7    | 5               | 335.96        | -53.01         | 503.52        | 8.05  | -5.90 |
| 8    | 6               | 558.83        | -47.11         | 774.34        | 11.72 | -5.84 |
| 9    | 9               | 1589.18       | -22.44         | 1994.18       | 5.40  | -2.08 |
| 10   | 8               | 1678.01       | -44.66         | 2199.01       | 2.69  | -5.91 |

VdW (van der Waals), ACE (Atomic Contact Energy), HB (Hydrogen Bonds Energy)
